# Supplementary material
Source: publisher figshare collection journal article supplement (https://acs.figshare.com/ndownloader/files/8867581)
Supplement: Supplementary file 1 [file 8867581]

1 **Supplemental Figure**

2 **Effect of aging on the absorption of small peptides in spontaneously hypertensive rats**

3

4 Vu Thi Hanh, Weilin Shen, Mitsuru Tanaka, Aino Siltari, Riita Korpela and Toshiro Matsui

5

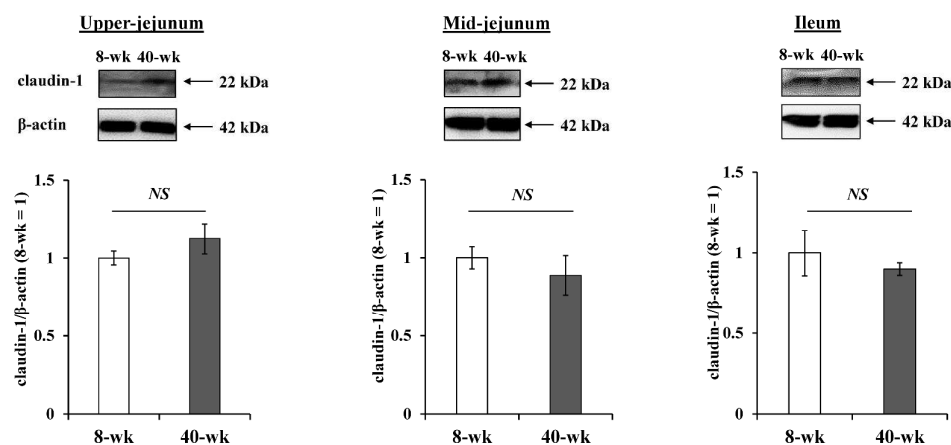

6

7 **Figure S-1.** Western blotting analyses of claudin-1 expression in the upper-jejunum,

8 mid-jejunum, and ileum regions from 8-wk and 40-wk SHRs. Statistical analyses between

9 two SHR groups were performed by unpaired Student's *t*-test. *NS* indicates no significant

10 difference at  $P > 0.05$ . As shown in the Figure, no significant difference in claudin-1

11 expression at each section was observed. This indicates that aging of SHRs did not alter the

12 expression of TJ proteins.
